# Supplementary material
Source: PubMed Central journal article supplement (PMC4135533)
Supplement: NIHMS594525-supplement-Supp_MaterialS2.pdf [file NIHMS594525-supplement-Supp_MaterialS2.pdf]

**HIV and hepatitis B/C testing history questionnaire**

**Information to respondent: We will now ask you questions about HIV and hepatitis B and C testing history.**

1. Have you ever donated blood?
- 1 Yes
  - 0 No
  - 97 Don't Know
  - 98 Refuse to answer
  - 99 Research Assistant only

**[If yes to 1]**

- 1a. When was the last time you donated blood?
- 1 > 5 years ago
  - 2 <= 5 years but > 2 years
  - 3 <= 2 years but > 1 year
  - 4 <= 1 year but > 6 months
  - 5 <= 6 months
  - 97 Don't Know
  - 98 Refuse to answer
  - 99 Research Assistant only

**[If yes to 1]**

- 2a. Except for tests you may have had as part of blood donations, have you ever been ever been tested for HIV?
- 1 Yes
  - 0 No
  - 97 Don't Know
  - 98 Refuse to answer
  - 99 Research Assistant only

**[If no to 1]**

- 2b. Have you ever been tested for HIV?
- 1 Yes
  - 0 No
  - 97 Don't Know
  - 98 Refuse to answer
  - 99 Research Assistant only

**[If yes to 1 and yes to 2a]**

- 3a. Not including blood donations, what was the **MAIN** reason for your last HIV test?  
(Choose one)
- 1 Exposure from sex
  - 2 Exposure from drugs
  - 3 Exposure from work
  - 4 Medical exam, hospitalization, or before surgery

- 5 Illness
- 6 Pregnancy
- 7 Health/Life insurance
- 8 Military requirement
- 9 Jail/prison
- 10 Getting married
- 12 Blood or blood product transfusion
- 13 For immigration/visa
- 14 Just wanted to know
- 15 Some other reason
- 97 Don't Know
- 98 Refuse to Answer
- 99 Research Assistant only

**[If no to 1 and yes to 2b]**

3b. What was the **MAIN** reason for your last HIV test? (Choose one)

- 1 Exposure from sex
- 2 Exposure from drugs
- 3 Exposure from work
- 4 Medical exam, hospitalization, or before surgery
- 5 Illness
- 6 Pregnancy
- 7 Health/Life insurance
- 8 Military requirement
- 9 Jail/prison
- 10 Getting married
- 12 Blood or blood product transfusion
- 13 For immigration/visa
- 14 Just wanted to know
- 15 Some other reason
- 97 Don't Know
- 98 Refuse to Answer
- 99 Research Assistant only

**[If yes or no to 1 and no to 2a or 2b]**

4. What is the **MAIN** reason you have not been tested for HIV? (Choose one)

- 1 Not at risk/not necessary
- 2 Scared I may have HIV
- 3 Worried about confidentiality
- 4 Don't know where/how to get tested
- 5 No time
- 6 Don't like needles/having blood taken
- 7 Hadn't considered it
- 8 Some other reason
- 9 Never been asked or offered a test
- 97 Don't Know
- 98 Refuse to Answer
- 99 Research Assistant only

**[If yes to 2a]**

- 5a. Not including blood donations, how long has it been since your last HIV test? (Choose one)
- 1 > 5 years ago
  - 2 <= 5 years but > 2 years
  - 3 <= 2 years but > 1 year
  - 4 <= 1 year but > 6 months
  - 5 <= 6 months
  - 97 Don't Know
  - 98 Refuse to Answer
  - 99 Research Assistant only

**[If yes to 2b]**

- 5b. How long has it been since your last HIV test?
- 1 > 5 years ago
  - 2 <= 5 years but > 2 years
  - 3 <= 2 years but > 1 year
  - 4 <= 1 year but > 6 months
  - 5 <= 6 months
  - 97 Don't Know
  - 98 Refuse to Answer
  - 99 Research Assistant only

**[If yes to 2a or 2b]**

6. Have you ever tested positive for HIV? (Choose one)
- 1 Yes
  - 0 No
  - 97 Don't Know
  - 98 Refuse to Answer
  - 99 Research Assistant only

**[If yes to 1]**

- 7a. I will now ask you some questions about Hepatitis B.

Hepatitis B is a kind of infection that affects the liver. It is different than hepatitis C. You can get tested for hepatitis B with a blood test.

Except for tests you may have had as part of blood donations, have you ever been tested for hepatitis B?

- 1 Yes
- 0 No
- 97 Don't Know
- 98 Refuse to Answer
- 99 Research Assistant only

**[If no to 1]**

- 7b. I will now ask you some questions about Hepatitis B.

Hepatitis B is a kind of infection that affects the liver. It is different than hepatitis C. You can get tested for hepatitis B with a blood test.

Have you ever been tested for hepatitis B?

- 1 Yes
- 0 No
- 97 Don't Know
- 98 Refuse to Answer
- 99 Research Assistant only

**[If yes to 7a]**

8a. Not including blood donations, how long has it been since your last hepatitis B test? (Choose one)

- 1 > 5 years ago
- 2 <= 5 years but > 2 years
- 3 <= 2 years but > 1 year
- 4 <= 1 year but > 6 months
- 5 <= 6 months
- 97 Don't Know
- 98 Refuse to Answer
- 99 Research Assistant only

**[If no to 1 and yes to 7b]**

8b. How long has it been since your last hepatitis B test? (Choose one)

- 1 > 5 years ago
- 2 <= 5 years but > 2 years
- 3 <= 2 years but > 1 year
- 4 <= 1 year but > 6 months
- 5 <= 6 months
- 97 Don't Know
- 98 Refuse to Answer
- 99 Research Assistant only

**[If yes to 1 and yes to 7a]**

9a. Not including blood donations, what was the **MAIN** reason for your last hepatitis B test? (Choose one)

- 1 Exposure from sex
- 2 Exposure from drugs
- 3 Exposure from work
- 4 Medical exam, hospitalization, or before surgery
- 5 Illness
- 6 Pregnancy
- 7 Health/Life insurance
- 8 Military requirement
- 9 Jail/prison
- 10 Getting married
- 11 Dialysis
- 12 Blood or blood product transfusion

- 13 For immigration/visa
- 14 Parent/family member had hepatitis B
- 15 Just wanted to know
- 16 Some other reason
- 97 Don't Know
- 98 Refuse to Answer
- 99 Research Assistant only

**[If no 1 and yes to 7b]**

9b. What was the **MAIN** reason for your last hepatitis B test? (Choose one)

- 1 Exposure from sex
- 2 Exposure from drugs
- 3 Exposure from work
- 4 Medical exam, hospitalization, or before surgery
- 5 Illness
- 6 Pregnancy
- 7 Health/Life insurance
- 8 Military requirement
- 9 Jail/prison
- 10 Getting married
- 11 Dialysis
- 12 Blood or blood product transfusion
- 13 For immigration/visa
- 14 Parent/family member had hepatitis B
- 15 Just wanted to know
- 16 Some other reason
- 97 Don't Know
- 98 Refuse to Answer
- 99 Research Assistant only

**[If no to 7a or 7b]**

10. What is the **MAIN** reason you have not been tested for hepatitis B? (Choose one)

- 1 Not at risk/not necessary
- 2 Scared I may have hepatitis B
- 3 Worried about confidentiality
- 4 Don't know where/how to get tested
- 5 No time
- 6 Don't like needles/having blood taken
- 7 Hadn't considered it
- 8 Some other reason
- 9 Never been asked or offered a test
- 97 Don't Know
- 98 Refuse to Answer
- 99 Research Assistant only

**[If yes to 7a or 7b]**

11. Have you ever tested positive for hepatitis B? (Choose one)

- 1 Yes
- 0 No
- 97 Don't Know
- 98 Refuse to Answer
- 99 Research Assistant only

12. Have you ever been vaccinated for hepatitis B?

- 1 Yes
- 0 No
- 97 Don't Know
- 98 Refuse to Answer
- 99 Research Assistant only

**[If yes to 12]**

13. How long has it been since your last hepatitis B vaccination?

- 1 > 5 years ago
- 2 <= 5 years but > 2 years
- 3 <= 2 years but >1 year
- 4 <= 1 year but > 6 months
- 5 <= 6 months
- 97 Don't Know
- 98 Refuse to Answer
- 99 Research Assistant only

**[If yes to 12]**

14. Think about the time when you were vaccinated for hepatitis B. Did you receive all three shots?

- 1 Yes
- 0 No
- 97 Don't Know
- 98 Refuse to Answer
- 99 Research Assistant only

**[If yes to 1]**

15a. I will now ask you some questions about Hepatitis C.

Hepatitis C is a kind of infection that affects the liver. It is different than hepatitis B. You can get tested for hepatitis C with a blood test.

Except for tests you may have had as part of blood donations, have you ever been tested for hepatitis C?

- 1 Yes
- 0 No
- 97 Don't Know
- 98 Refuse to Answer
- 99 Research Assistant only

**[If no to 1]**

15b. I will now ask you some questions about Hepatitis C. Hepatitis C is a kind of infection that affects the liver. It is different than hepatitis B. You can get tested for hepatitis C with a blood test.

Have you ever been tested for hepatitis C?

- 1 Yes
- 0 No
- 97 Don't Know
- 98 Refuse to Answer
- 99 Research Assistant only

**[If yes to 15a or 15b]**

16. Have you ever tested positive for hepatitis C? (Choose one)

- 1 Yes
- 0 No
- 97 Don't Know
- 98 Refuse to Answer
- 99 Research Assistant only

**[If no 1 and yes to 15b]**

17. What was the **MAIN** reason you got tested for hepatitis C when you found out you had it? (Choose one)

- 1 Exposure from sex
- 2 Exposure from drugs
- 3 Exposure from work
- 4 Medical exam, hospitalization, or before surgery
- 5 Illness
- 6 Pregnancy
- 7 Health/Life insurance
- 8 Military requirement
- 9 Jail/prison
- 10 Getting married
- 11 Dialysis
- 12 Blood or blood product transfusion
- 13 For immigration/visa
- 14 Parent/family member had hepatitis C
- 15 Just wanted to know
- 16 Some other reason
- 97 Don't Know
- 98 Refuse to Answer
- 99 Research Assistant only

**[If yes to 15a]**

18a. Not including blood donations, how long has it been since your last hepatitis C test? (Choose one)

- 1 > 5 years ago
- 2 <= 5 years but > 2 years
- 3 <= 2 years but > 1 year

- 4      <= 1 year but > 6 months
- 5      <= 6 months
- 97     Don't Know
- 98     Refuse to Answer
- 99     Research Assistant only

**[If no to 1 and yes to 15b]**

18b.    How long has it been since your last hepatitis C test? (Choose one)

- 1      > 5 years ago
- 2      <= 5 years but > 2 years
- 3      <= 2 years but > 1 year
- 4      <= 1 year but > 6 months
- 5      <= 6 months
- 97     Don't Know
- 98     Refuse to Answer
- 99     Research Assistant only

**[If yes to 1 and yes to 15a]**

19a.    Not including blood donations, what was the **MAIN** reason for your last hepatitis C test?  
(Choose one)

- 1      Exposure from sex
- 2      Exposure from drugs
- 3      Exposure from work
- 4      Medical exam, hospitalization, or before surgery
- 5      Illness
- 6      Pregnancy
- 7      Health/Life insurance
- 8      Military requirement
- 9      Jail/prison
- 10     Getting married
- 11     Dialysis
- 12     Blood or blood product transfusion
- 13     For immigration/visa
- 14     Parent/family member had hepatitis C
- 15     Just wanted to know
- 16     Some other reason
- 97     Don't Know
- 98     Refuse to Answer
- 99     Research Assistant only

**[If yes to 1 and yes to 15a]**

19b.    What was the **MAIN** reason for your last hepatitis C test? (Choose one)

- 1      Exposure from sex
- 2      Exposure from drugs
- 3      Exposure from work
- 4      Medical exam, hospitalization, or before surgery
- 5      Illness
- 6      Pregnancy

- 7 Health/Life insurance
- 8 Military requirement
- 9 Jail/prison
- 10 Getting married
- 11 Dialysis
- 12 Blood or blood product transfusion
- 13 For immigration/visa
- 14 Parent/family member had hepatitis C
- 15 Just wanted to know
- 16 Some other reason
- 97 Don't Know
- 98 Refuse to Answer
- 99 Research Assistant only

**[If no to 15a or 15b]**

20. What is the **MAIN** reason you have NOT been tested for hepatitis C? (Choose one)

- 1 Not at risk/not necessary
- 2 Scared I may have hepatitis C
- 3 Worried about confidentiality
- 4 Don't know where/how to get tested
- 5 No time
- 6 Don't like needles/having blood taken
- 7 Hadn't considered it
- 8 Some other reason
- 9 Never been asked or offered a test
- 97 Don't Know
- 98 Refuse to Answer
- 99 Research Assistant only
