# Supplementary material
Source: PubMed Central journal article supplement (PMC4135533)
Supplement: NIHMS594525-supplement-Supp_MaterialS5.pdf [file NIHMS594525-supplement-Supp_MaterialS5.pdf]

**Data Supplement 5 Pre- and Post- Opinions on Screening**

**Please read each of the statements that follow and select the answer that best describes what you believe**

1. I think being tested for HIV, and hepatitis C in the emergency department takes too long.
  - 1 Definitely Too Long
  - 2 Probably Too Long
  - 3 Maybe Too Long
  - 4 Probably Not Too Long
  - 5 Definitely Not Too Long
  - 97 Don't know
  - 98 Refuse to answer
  - 99 Research Assistant Only
  
2. I think being tested for HIV, and hepatitis C in the emergency department delays medical care.
  - 1 Definitely Delays
  - 2 Probably Delays
  - 3 Maybe Delays
  - 4 Probably Does Not Delay
  - 5 Definitely Does Not Delay
  - 97 Don't know
  - 98 Refuse to answer
  - 99 Research Assistant Only
  
3. I think being tested for HIV, and hepatitis C in the emergency department is too stressful.
  - 1 Definitely Too Stressful
  - 2 Probably Too Stressful
  - 3 Maybe Too Stressful
  - 4 Probably Not Too Stressful
  - 5 Definitely Not Too Stressful
  - 97 Don't know
  - 98 Refuse to answer
  - 99 Research Assistant Only
  
4. I think the emergency department is not a private enough place for testing for HIV, and hepatitis C.
  - 1 Definitely Not Private Enough
  - 2 Probably Not Private Enough
  - 3 Maybe Private Enough
  - 4 Probably Private Enough
  - 5 Definitely Private Enough
  - 97 Don't know
  - 98 Refuse to answer
  - 99 Research Assistant Only

**Value of Combined HIV and hepatitis C Screening**

**We now want to ask your opinions about testing for HIV and hepatitis C in the emergency department.**

1. How important is it for the emergency department to offer testing for HIV, and hepatitis C to patients?
  - 1 Not at all important
  - 2 A little important
  - 3 Somewhat important
  - 4 Important
  - 5 Very important
  - 97 Don't know
  - 98 Refuse to answer
  - 99 Research assistant only
  
2. How important is it for **YOU** to be tested for HIV and hepatitis C in the emergency department?
  - 1 Not at all important
  - 2 A little important
  - 3 Somewhat important
  - 4 Important
  - 5 Very important
  - 97 Don't know
  - 98 Refuse to answer
  - 99 Research assistant only
  
3. How much do you think you are at risk for having an HIV infection?
  - 0 I am not at risk
  - 1 I am not much at risk
  - 2 I am somewhat at risk
  - 3 I am pretty much at risk
  - 4 I am very much at risk
  - 97 Don't Know
  - 98 Refuse to Answer
  - 99 Research Assistant Only
  
4. How much do you think you are at risk for having an hepatitis C infection?
  - 0 I am not at risk
  - 1 I am not much at risk
  - 2 I am somewhat at risk
  - 3 I am pretty much at risk
  - 4 I am very much at risk
  - 97 Don't Know
  - 98 Refuse to Answer
  - 99 Research Assistant Only
