# Supplementary material
Source: PubMed Central journal article supplement (PMC4135533)
Supplement: NIHMS594525-supplement-Supp_MaterialS7.pdf [file NIHMS594525-supplement-Supp_MaterialS7.pdf]

**Data Supplement 7: HIV and hepatitis C screening uptake questionnaire**

1. As part of a study, we would like to offer you free rapid tests for HIV, and hepatitis C in the emergency department. The tests involve a sample of blood that will be taken by the emergency department nurse. The results of these will be available in about **30minutes**. Would you like to get tested for HIV, and hepatitis C today in the emergency department?

- 1 Yes
- 0 No
- 97 Don't know
- 98 Refuse to answer
- 99 Research Assistant only

**[If 1 is Yes]**

- 1a. We are interested in why people would like to get a tested HIV, and hepatitis C in the emergency department. What is the main reason you would like to get tested for HIV, and hepatitis C in the Emergency Department today?

- 0 Concerned about HIV, and hepatitis C because of sex or drug exposure
- 1 Convenient to be tested now in the Emergency Department
- 2 Nothing better to do/bored
- 3 Free tests
- 4 Because you asked
- 97 Don't know
- 98 Refuse to answer
- 99 Research Assistant only

**[If 1 is No]**

- 1b. We are interested in why people decide **NOT** to get tested for HIV, and hepatitis C in the Emergency Department. What is the main reason you would **NOT** like to get tested for HIV, and hepatitis C in the Emergency Department today?

- 01 In too much pain
- 02 Too tired
- 03 Not enough time
- 04 Too stressful
- 05 Feel too ill
- 06 Recently tested
- 07 Family/others present
- 08 Worried about confidentiality
- 09 Don't believe it's necessary for me/not at risk
- 10 Don't want to know
- 11 Don't want needlestick/ blood sample taken
- 12 Plan to be tested in the future

- 97 Don't know
- 98 Refuse to answer
- 99 Research Assistant only

**[If 1 is yes]**

***RA: As you know, you will soon be tested for HIV, and hepatitis C. Some people will have a test result that shows they have HIV, and/or hepatitis C. For these people, getting this test result can be stressful. How would you handle your test results if they show you have HIV, and/or hepatitis C?***

- 2. Do you have someone you can talk to about your results?
  - 1 Yes, ready.
  - 0 No, not ready. Not tested.
  
- 2a. Written Informed Consent/HIPPA.
  - 1 Written informed consent/HIPPA waiver obtained.
  - 0 Written informed consent/HIPPA waiver not obtained: Dropout.

**HIV vs. hepatitis C screening preferences**

***As you know we just asked you about getting tested for HIV and hepatitis C TOGETHER.***

- 1. Just out of curiosity, if we had offered you to be tested for these infections separately, which infections would you have wanted us to ask you to be tested for?
  - \_\_\_\_\_ HIV
  - \_\_\_\_\_ HCV
  - \_\_\_\_\_ I am ok with testing for both infections
- 97 Don't know
- 98 Refuse to answer
- 99 Research Assistant Only

**[If 1 = HIV only]**

- 2. Why would you have preferred to be tested for HIV only?
  - 1 I feel more at risk for this infection
  - 2 I have heard a lot about HIV
  - 3 I am more worried about this infection
  - 4 I know I am not at risk for the other infections
- 97 Don't know
- 98 Refuse to answer
- 99 Research Assistant Only

**[If 1 = HCV only]**

- 3. Why would you have preferred to be tested for HCV only?
  - 1 I feel more at risk for this infection
  - 2 I have heard a lot about HCV
  - 3 I am more worried about this infection

- 4 I know I am not at risk for the other infections
- 97 Don't know
- 98 Refuse to answer
- 99 Research Assistant Only
