# Supplementary material
Source: PubMed Central journal article supplement (PMC4135533)
Supplement: NIHMS594525-supplement-Supp_MaterialS8.pdf [file NIHMS594525-supplement-Supp_MaterialS8.pdf]

Data Supplement 8: InVITED participants' past 3-month drug use/misuse by study arm

| Drug Category                                    | No Intervention<br><i>n=197</i> |          |            | Intervention<br><i>n=198</i> |          |            |
|--------------------------------------------------|---------------------------------|----------|------------|------------------------------|----------|------------|
|                                                  | Past<br>3-month<br>misuse       | Injected | Prescribed | Past<br>3-month<br>misuse    | Injected | Prescribed |
|                                                  | %                               | %        | %          | %                            | %        | %          |
| <b>Illicit drugs</b>                             |                                 |          |            |                              |          |            |
| Cocaine                                          | 10.2                            | 0.5      | 0.0        | 11.6                         | 0.5      | 0.0        |
| Crack                                            | 5.6                             | 0.5      | 0.0        | 4.0                          | 0.0      | 0.0        |
| Crystal methamphetamine                          | 0.5                             | 0.0      | 0.0        | 0.5                          | 0.0      | 0.0        |
| Ecstasy or MDMA                                  | 3.0                             | 0.0      | 0.0        | 4.0                          | 0.0      | 0.0        |
| Gasoline                                         | 1.0                             | 0.0      | 0.0        | 0.0                          | 0.0      | 0.0        |
| Glues                                            | 0.0                             | 0.0      | 0.0        | 0.0                          | 0.0      | 0.0        |
| Paint thinners                                   | 0.0                             | 0.0      | 0.0        | 0.0                          | 0.0      | 0.0        |
| Poppers/snappers (nitrous oxide)                 | 0.5                             | 0.0      | 0.0        | 0.5                          | 0.0      | 0.0        |
| Spray paint or other aerosols                    | 0.0                             | 0.0      | 0.0        | 0.0                          | 0.0      | 0.0        |
| Whippets (nitrous oxide)                         | 0.0                             | 0.0      | 0.0        | 0.0                          | 0.0      | 0.0        |
| LSD                                              | 2.0                             | 0.0      | 0.0        | 2.0                          | 0.0      | 0.0        |
| Mushrooms                                        | 2.0                             | 0.0      | 0.0        | 2.0                          | 0.0      | 0.0        |
| Dextromethorphan (DM, DXM)                       | 0.5                             | 0.0      | 0.0        | 0.5                          | 0.0      | 0.0        |
| Coricidin C ("Robo")                             | 0.0                             | 0.0      | 0.0        | 0.0                          | 0.0      | 0.0        |
| Herbal hallucinogens                             | 0.5                             | 0.0      | 0.0        | 2.0                          | 0.0      | 0.0        |
| Ketamine                                         | 0.5                             | 0.0      | 0.0        | 0.5                          | 0.0      | 0.0        |
| PCP                                              | 0.0                             | 0.0      | 0.0        | 0.0                          | 0.0      | 0.0        |
| Peyote                                           | 0.0                             | 0.0      | 0.0        | 0.5                          | 0.0      | 0.0        |
| Heroin                                           | 3.0                             | 0.5      | 0.0        | 1.5                          | 1.0      | 0.0        |
| Opium                                            | 1.0                             | 0.0      | 0.0        | 2.5                          | 0.0      | 0.0        |
| <b>Marijuana</b>                                 | 90.9                            | 0.0      | 4.0        | 88.4                         | 0.0      | 4.5        |
| <b>Amphetamines</b>                              |                                 |          |            |                              |          |            |
| Adderall                                         | 3.6                             | 0.0      | 1.5        | 4.5                          | 0.0      | 0.5        |
| Concerta                                         | 0.0                             | 0.0      | 0.0        | 0.5                          | 0.0      | 0.0        |
| Dexedrine                                        | 0.0                             | 0.0      | 0.0        | 0.5                          | 0.0      | 0.0        |
| Focalin                                          | 0.5                             | 0.0      | 0.0        | 0.0                          | 0.0      | 0.0        |
| Methylin, Metadate, or Ritalin (methylphenidate) | 1.0                             | 0.0      | 0.0        | 0.5                          | 0.0      | 0.0        |
| <b>Benzodiazepines</b>                           |                                 |          |            |                              |          |            |
| Lorazepam                                        | 1.5                             | 0.0      | 0.5        | 2.5                          | 0.0      | 1.5        |
| Quazepam                                         | 0.0                             | 0.0      | 0.0        | 0.0                          | 0.0      | 0.0        |
| Flurazepam                                       | 0.0                             | 0.0      | 0.0        | 0.0                          | 0.0      | 0.0        |

|                                                                                                                                                        |      |     |     |      |     |     |
|--------------------------------------------------------------------------------------------------------------------------------------------------------|------|-----|-----|------|-----|-----|
| Trizolam                                                                                                                                               | 0.0  | 0.0 | 0.0 | 0.0  | 0.0 | 0.0 |
| Clonazepam                                                                                                                                             | 3.6  | 0.0 | 0.5 | 5.6  | 0.0 | 2.0 |
| Chlordiazepoxide                                                                                                                                       | 0.5  | 0.0 | 0.0 | 0.0  | 0.0 | 0.0 |
| Temazepam                                                                                                                                              | 0.0  | 0.0 | 0.0 | 0.5  | 0.0 | 0.0 |
| Clorazepate                                                                                                                                            | 0.0  | 0.0 | 0.0 | 0.0  | 0.0 | 0.0 |
| Diazepam                                                                                                                                               | 4.6  | 0.0 | 1.0 | 4.0  | 0.0 | 2.0 |
| Alpraxolam                                                                                                                                             | 5.1  | 0.0 | 0.5 | 4.5  | 0.0 | 0.5 |
| <b>Barbiturates</b>                                                                                                                                    |      |     |     |      |     |     |
| Butobarbital                                                                                                                                           | 0.0  | 0.0 | 0.0 | 0.0  | 0.0 | 0.0 |
| Pentobarbital                                                                                                                                          | 0.0  | 0.0 | 0.0 | 0.0  | 0.0 | 0.0 |
| Secobarbital                                                                                                                                           | 0.0  | 0.0 | 0.0 | 0.0  | 0.0 | 0.0 |
| Phenobarbital                                                                                                                                          | 0.0  | 0.0 | 0.0 | 0.0  | 0.0 | 0.0 |
| <b>Methadone</b>                                                                                                                                       | 2.0  | 0.5 | 0.0 | 0.0  | 0.0 | 0.0 |
| <b>Buprenorphine</b>                                                                                                                                   | 2.5  | 0.5 | 0.0 | 1.0  | 0.0 | 0.0 |
| <b>Prescription opioid analgesics</b>                                                                                                                  |      |     |     |      |     |     |
| Propoxyphene                                                                                                                                           | 0.5  | 0.0 | 0.0 | 0.0  | 0.0 | 0.0 |
| Propoxyphene                                                                                                                                           | 0.0  | 0.0 | 0.0 | 0.0  | 0.0 | 0.0 |
| Meperidine                                                                                                                                             | 0.0  | 0.0 | 0.0 | 0.0  | 0.0 | 0.0 |
| Hydromorphone                                                                                                                                          | 1.0  | 0.0 | 0.5 | 0.5  | 0.0 | 0.5 |
| Fentanyl buccal                                                                                                                                        | 0.0  | 0.0 | 0.0 | 0.0  | 0.0 | 0.0 |
| Lortab                                                                                                                                                 | 0.5  | 0.0 | 0.0 | 0.5  | 0.0 | 0.0 |
| Oxycodone                                                                                                                                              | 4.6  | 0.0 | 1.0 | 4.5  | 0.0 | 1.5 |
| Acetaminophen and<br>oxycodone                                                                                                                         | 8.6  | 0.0 | 4.5 | 10.6 | 0.0 | 4.5 |
| Vicodin                                                                                                                                                | 11.2 | 0.0 | 4.5 | 12.1 | 0.0 | 6.0 |
| DM = Dextromethorphan<br>DXM = Dextromethorphan<br>LSD = Lysergic acid diethylamide<br>MDMA = 3,4-methylenedioxymethamphetamine<br>PCP = Phencyclidine |      |     |     |      |     |     |
