# Supplementary material
Source: PubMed Central journal article supplement (PMC4135533)
Supplement: NIHMS594525-supplement-Supp_MaterialS9.pdf [file NIHMS594525-supplement-Supp_MaterialS9.pdf]

**Data Supplement 9**

| <b>HIV/HCV risk behavior questionnaire responses (injection-drug use)</b> | <b>No Intervention</b> |               | <b>Intervention</b> |               |
|---------------------------------------------------------------------------|------------------------|---------------|---------------------|---------------|
|                                                                           | <i>n=197</i>           |               | <i>n=198</i>        |               |
|                                                                           | <b>Male</b>            | <b>Female</b> | <b>Male</b>         | <b>Female</b> |
|                                                                           | <i>n=110</i>           | <i>n=87</i>   | <i>n=108</i>        | <i>n=90</i>   |
|                                                                           | <b>%</b>               | <b>%</b>      | <b>%</b>            | <b>%</b>      |
| <b>Injection of drugs for non-medical use</b>                             |                        |               |                     |               |
| Ever                                                                      | 7.3                    | 1.1           | 5.6                 | 1.1           |
| Past 3 months                                                             | 1.8                    | 0.0           | 1.9                 | 0.0           |
| <b>Ever shared needles or syringes to inject "street drugs"</b>           |                        |               |                     |               |
| With a person who had HIV or AIDS                                         | 0.0                    | 0.0           | 0.0                 | 0.0           |
| With a person who had HCV                                                 | 0.0                    | 0.0           | 0.0                 | 0.0           |
| <b>Ever shared a cooker, cottons, or water to inject "street drugs"</b>   |                        |               |                     |               |
| With a person who had HIV or AIDS                                         | 0.0                    | 0.0           | 0.0                 | 0.0           |
| With a person who had HCV                                                 | 0.0                    | 0.0           | 0.0                 | 0.0           |
| <b>Ever "back-loaded" or "piggy-backed" "street drugs"</b>                |                        |               |                     |               |
| With a person who had HIV or AIDS                                         | 0.0                    | 0.0           | 0.9                 | 0.0           |
| With a person who had HCV                                                 | 0.0                    | 0.0           | 0.9                 | 0.0           |
| AIDS = acquired immune deficiency syndrome                                |                        |               |                     |               |
| HCV = hepatitis C virus                                                   |                        |               |                     |               |
| HIV = human immunodeficiency virus                                        |                        |               |                     |               |

**HIV/HCV risk behavior questionnaire responses (heterosexual sex)**

| Behavior                                                | <u>No Intervention</u>     |               |                 |                           |               |                 | <u>Intervention</u>        |               |                 |                           |               |                 |
|---------------------------------------------------------|----------------------------|---------------|-----------------|---------------------------|---------------|-----------------|----------------------------|---------------|-----------------|---------------------------|---------------|-----------------|
|                                                         | <i>n=197</i>               |               |                 | <i>n=198</i>              |               |                 | <i>n=198</i>               |               |                 | <i>n=108</i>              |               |                 |
|                                                         | Female<br><i>n=87</i><br>% |               |                 | Male<br><i>n=110</i><br>% |               |                 | Female<br><i>n=90</i><br>% |               |                 | Male<br><i>n=108</i><br>% |               |                 |
| <b>Ever had vaginal and/or anal sex with man/female</b> | 96.6                       |               |                 | 87.3                      |               |                 | 93.3                       |               |                 | 92.6                      |               |                 |
| <b>Types of partners</b>                                | <u>Main</u>                | <u>Casual</u> | <u>Exchange</u> | <u>Main</u>               | <u>Casual</u> | <u>Exchange</u> | <u>Main</u>                | <u>Casual</u> | <u>Exchange</u> | <u>Main</u>               | <u>Casual</u> | <u>Exchange</u> |
| <b>Sexual behaviors and partner characteristics</b>     | 93.1                       | 65.5          | 8.0             | 81.8                      | 73.6          | 16.4            | 88.9                       | 58.9          | 14.4            | 88.9                      | 77.8          | 8.3             |
| Did not use condoms                                     | 88.5                       | 40.2          | 4.6             | 76.4                      | 52.7          | 10.0            | 82.2                       | 41.1          | 4.4             | 77.8                      | 47.2          | 3.7             |
| Any of those partners had HIV or AIDS                   | 0.0                        | 0.0           | 0.0             | 0.0                       | 0.0           | 0.0             | 0.0                        | 0.0           | 0.0             | 0.9                       | 0.9           | 0.0             |
| Any of those partners had HCV                           | 1.1                        | 0.0           | 0.0             | 0.0                       | 0.0           | 0.0             | 0.0                        | 0.0           | 0.0             | 0.9                       | 0.9           | 0.0             |
| Any of those partners had other STIs                    | 12.6                       | 4.6           | 0.0             | 7.3                       | 7.3           | 1.8             | 15.6                       | 8.9           | 1.1             | 12.0                      | 12.0          | 0.0             |
| Any of those partners ever injected drugs               | 4.6                        | 1.1           | 0.0             | 2.7                       | 2.7           | 0.0             | 10.0                       | 3.3           | 1.1             | 2.8                       | 2.8           | 0.0             |
| Any of those partners ever had sex with other men       | 6.9                        | 4.6           | 1.1             | N/A                       | N/A           | N/A             | 5.6                        | 3.3           | 0.0             | N/A                       | N/A           | N/A             |
|                                                         | <b>Median (IQR)</b>        |               |                 | <b>Median (IQR)</b>       |               |                 | <b>Median (IQR)</b>        |               |                 | <b>Median (IQR)</b>       |               |                 |
|                                                         | <u>Main</u>                | <u>Casual</u> | <u>Exchange</u> | <u>Main</u>               | <u>Casual</u> | <u>Exchange</u> | <u>Main</u>                | <u>Casual</u> | <u>Exchange</u> | <u>Main</u>               | <u>Casual</u> | <u>Exchange</u> |
| No condom use with partners                             | 2 (2-5)                    | 2 (1-6)       | 2 (2-19)        | 3 (2-9)                   | 6 (2-15)      | 5.5 (3.5-20)    | 3 (2-4)                    | 3 (2-6)       | 20 (11.5-30)    | 4 (2-10)                  | 6 (3-15)      | 3 (2-11.5)      |
| No condom use with partners total                       | 3 (2-6)                    |               |                 | 4.5 (2-15)                |               |                 | 3 (1-6)                    |               |                 | 5 (1-14.5)                |               |                 |

AIDS = acquired immune deficiency syndrome; HCV = hepatitis C virus; HIV = human immunodeficiency virus; IQR = interquartile range; N/A = not applicable; STI = sexually transmitted infection

**HIV/HCV risk behavior questionnaire responses (male-male sex)**

|                                             | No Intervention       |               |                 |                       |                 |                 | Intervention          |               |                 |                       |                 |                 |
|---------------------------------------------|-----------------------|---------------|-----------------|-----------------------|-----------------|-----------------|-----------------------|---------------|-----------------|-----------------------|-----------------|-----------------|
|                                             | <i>n=197</i>          |               |                 |                       |                 |                 | <i>n=198</i>          |               |                 |                       |                 |                 |
|                                             | %                     |               |                 |                       |                 |                 | %                     |               |                 |                       |                 |                 |
| Ever had anal sex with a man                | 2.0                   |               |                 |                       |                 |                 | 2.0                   |               |                 |                       |                 |                 |
| Type of partner                             | <i>Main</i>           |               | <i>Casual</i>   |                       | <i>Exchange</i> |                 | <i>Main</i>           |               | <i>Casual</i>   |                       | <i>Exchange</i> |                 |
|                                             | 2.7                   |               | 3.6             |                       | 0.0             |                 | 1.9                   |               | 1.9             |                       | 0.0             |                 |
| Sexual behavior and partner characteristics | <i>Top</i>            |               |                 | <i>Bottom</i>         |                 |                 | <i>Top</i>            |               |                 | <i>Bottom</i>         |                 |                 |
|                                             | <i>Main</i>           | <i>Casual</i> | <i>Exchange</i> | <i>Main</i>           | <i>Casual</i>   | <i>Exchange</i> | <i>Main</i>           | <i>Casual</i> | <i>Exchange</i> | <i>Main</i>           | <i>Casual</i>   | <i>Exchange</i> |
| Had anal sex                                | 0.9                   | 2.7           | 0.0             | 2.7                   | 1.8             | 0.0             | 1.9                   | 0.9           | 0.0             | 0.0                   | 0.9             | 0.0             |
| Did not use condoms                         | 0.9                   | 2.7           | 0.0             | 2.7                   | 1.8             | 0.0             | 1.9                   | 0.9           | 0.0             | 0.0                   | 0.9             | 0.0             |
| Any of those partners had HIV or AIDS       | 0.9                   | 0.9           | 0.0             | 0.0                   | 0.9             | 0.0             | 0.0                   | 0.0           | 0.0             | 0.0                   | 0.0             | 0.0             |
| Any of those partners had hepatitis C       | 0.0                   | 0.0           | 0.0             | 0.0                   | 0.0             | 0.0             | 0.0                   | 0.0           | 0.0             | 0.0                   | 0.0             | 0.0             |
| Any of those partners had other STIs        | 0.0                   | 0.9           | 0.0             | 0.0                   | 0.9             | 0.0             | 0.9                   | 0.0           | 0.0             | 0.0                   | 0.0             | 0.0             |
| Any of those partners ever injected drugs   | 0.0                   | 0.0           | 0.0             | 0.0                   | 0.0             | 0.0             | 0.0                   | 0.0           | 0.0             | 0.0                   | 0.0             | 0.0             |
|                                             | <b>Median (range)</b> |               |                 | <b>Median (range)</b> |                 |                 | <b>Median (range)</b> |               |                 | <b>Median (range)</b> |                 |                 |
|                                             | <i>Top</i>            |               |                 | <i>Bottom</i>         |                 |                 | <i>Top</i>            |               |                 | <i>Bottom</i>         |                 |                 |
|                                             | <i>Main</i>           | <i>Casual</i> | <i>Exchange</i> | <i>Main</i>           | <i>Casual</i>   | <i>Exchange</i> | <i>Main</i>           | <i>Casual</i> | <i>Exchange</i> | <i>Main</i>           | <i>Casual</i>   | <i>Exchange</i> |
| No condom use with partners                 | 25 (25-25)            | 2 (2-40)      | N/A             | 2 (1-3)               | 49 (1-97)       | N/A             | 2 (1-3)               | 2 (2-2)       | N/A             | N/A                   | N/A             | N/A             |
| No condom use with partners total           | 3 (2-65)              |               |                 | 51 (2-100)            |                 |                 | 3 (1-5)               |               |                 | 5 (5-5)               |                 |                 |

AIDS = acquired immune deficiency syndrome; HCV = hepatitis C virus; HIV = human immunodeficiency virus; N/A = not applicable; STD = sexually transmitted infection
