# Supplementary material
Source: PubMed Central journal article supplement (PMC4135533)
Supplement: NIHMS594525-supplement-Supp_MaterialS10.pdf [file NIHMS594525-supplement-Supp_MaterialS10.pdf]

Data Supplement 10: Demographic, clinical, and other characteristics and risk-taking behaviors of InVITED participants with a reactive HCV antibody test

| Participants who tested positive for rapid HCV testing |                                                                                                              |                                        |                                        |                                        |                                        |                                                  |                                              |
|--------------------------------------------------------|--------------------------------------------------------------------------------------------------------------|----------------------------------------|----------------------------------------|----------------------------------------|----------------------------------------|--------------------------------------------------|----------------------------------------------|
|                                                        | <u>Subject 1</u>                                                                                             | <u>Subject 2</u>                       | <u>Subject 3</u>                       | <i>n = 7</i><br><u>Subject 4</u>       | <u>Subject 5</u>                       | <u>Subject 6*</u>                                | <u>Subject 7*</u>                            |
| <b>Age</b>                                             | 25                                                                                                           | 29                                     | 32                                     | 34                                     | 41                                     | 44                                               | 51                                           |
| <b>Sex</b>                                             | Male                                                                                                         | Male                                   | Male                                   | Male                                   | Male                                   | Female                                           | Male                                         |
| <b>Source of medical care</b>                          | ED                                                                                                           | Private clinic/practice                | Hospital or community health clinics   | ED                                     | ED                                     | Hospital or community health clinics             | Urgent care center                           |
| <b>Study arm</b>                                       | No intervention                                                                                              | No intervention                        | Intervention                           | No intervention                        | Intervention                           | Intervention                                     | Intervention                                 |
| <b>HIV testing history</b>                             |                                                                                                              |                                        |                                        |                                        |                                        |                                                  |                                              |
| Ever tested and how                                    | Never donated blood or tested for HIV                                                                        | Donated blood but never tested for HIV | Tested but not part of blood donations           | Donated blood but never tested for HIV       |
| Time elapsed since last test                           | N/A                                                                                                          | N/A                                    | ≤ 2 years but > 1 year ago             | ≤ 5 years but > 2 years ago            | ≤ 6 months ago                         | > 5 years ago                                    | N/A                                          |
| Reason for last HIV test                               | N/A                                                                                                          | N/A                                    | Blood or blood product transfusion     | Jail/prison                            | Jail/prison                            | Jail/prison                                      | N/A                                          |
| Reason for not testing for HIV                         | Hadn't considered it                                                                                         | Never been asked or offered a test     | N/A                                    | N/A                                    | N/A                                    | N/A                                              | Never been asked or offered a test           |
| <b>HCV testing history</b>                             |                                                                                                              |                                        |                                        |                                        |                                        |                                                  |                                              |
| Ever tested and how                                    | Never donated blood or tested for HCV                                                                        | Donated blood but never tested for HCV | Tested but not part of blood donations           | Donated blood but never tested for HCV       |
| Time elapsed since last test                           | N/A                                                                                                          | N/A                                    | ≤ 2 years but > 1 year ago             | ≤ 5 years but > 2 years ago            | ≤ 6 months ago                         | > 5 years ago                                    | N/A                                          |
| Reason for last HCV test                               | N/A                                                                                                          | N/A                                    | Blood or blood product transfusion     | Jail/prison                            | Jail/prison                            | Jail/prison                                      | N/A                                          |
| Reason for not testing for HCV                         | Hadn't considered it                                                                                         | Never been asked or offered a test     | N/A                                    | N/A                                    | N/A                                    | N/A                                              | Never been asked or offered a test           |
| <b>Past 3 months drug use ASSIST category</b>          | Marijuana, Cocaine or crack, Methamphetamines, Hallucinogens, Illicit opioids, Benzodiazepines, Methadone or | Illicit opioids, Benzodiazepines       | Marijuana                              | Marijuana                              | Marijuana                              | Cocaine or crack, Prescription opioid analgesics | Marijuana, Cocaine or crack, Illicit opioids |

|                                              | buprenorphine,<br>Prescription opioid<br>analgesics |                       |                    |                       |                                        |                                                                                               |                       |
|----------------------------------------------|-----------------------------------------------------|-----------------------|--------------------|-----------------------|----------------------------------------|-----------------------------------------------------------------------------------------------|-----------------------|
| <b>Injection Drug Use</b>                    | Yes, past 3 months                                  | Never                 | Never              | Never                 | Yes but not in<br>the past 3<br>months | Never                                                                                         | Yes, past 3<br>months |
| <b>Shared needles</b>                        | Yes                                                 | No                    | No                 | No                    | No                                     | No                                                                                            | Yes                   |
| <b>Total drug ASSIST score</b>               | 135                                                 | 45                    | 29                 | 16                    | 18                                     | 55                                                                                            | 64                    |
| <b>WHO recommended drug<br/>intervention</b> | Intensive intervention                              | Brief<br>intervention | Brief intervention | Brief<br>intervention | Brief<br>intervention                  | Intensive<br>intervention                                                                     | Brief<br>intervention |
| <b>Sexual risk-taking behaviors</b>          |                                                     |                       |                    |                       |                                        |                                                                                               |                       |
| Type of partners                             | Main, casual,<br>exchange                           | Main                  | Main, casual       | None                  | Main, casual                           | Main,<br>exchange                                                                             | Don't know            |
| Had anal sex with men                        | No                                                  | No                    | No                 | No                    | No                                     | N/A                                                                                           | No                    |
| Did not use condoms                          | Yes                                                 | Yes                   | Yes                | N/A                   | Yes                                    | Used no<br>condoms with<br>main partners,<br>but used<br>condoms with<br>exchange<br>partners | N/A                   |
| Partners had HIV or AIDS                     | Don't know                                          | No                    | Don't know         | N/A                   | No                                     | No                                                                                            | N/A                   |
| Partners had other STD                       | Don't know                                          | Don't know            | Don't know         | N/A                   | No                                     | Yes                                                                                           | N/A                   |
| Partners ever injected drugs                 | Don't know                                          | Don't know            | Don't know         | N/A                   | Yes                                    | Yes                                                                                           | N/A                   |
| No condoms use with partners<br>total        | 20 main, 20 casual,<br>20 exchange                  | 5 main                | 8 main, 13 casual  | N/A                   | 20 main, 25<br>casual                  | 6 main                                                                                        | N/A                   |
| *Identified as HCV infected after enrollment |                                                     |                       |                    |                       |                                        |                                                                                               |                       |

AIDS = Acquired Immune Deficiency Syndrome; ASSIST = Alcohol, Smoking and Substance Involvement Screening Test; ED = Emergency Department; HCV = Hepatitis C Virus; N/A = Not Applicable; STD = Sexual Transmitted Disease; WHO = World Health Organization
