# Supplementary material
Source: PubMed Central journal article supplement (PMC4135533)
Supplement: NIHMS594525-supplement-Supp_MaterialS11.pdf [file NIHMS594525-supplement-Supp_MaterialS11.pdf]

**Data Supplement 11. Preferences on HIV/HCV screening by InVITED participants**

| Preferences                                          | No Intervention, <i>n</i> = 197                             |                                                            | Intervention, <i>n</i> = 198                                |                                                            |
|------------------------------------------------------|-------------------------------------------------------------|------------------------------------------------------------|-------------------------------------------------------------|------------------------------------------------------------|
|                                                      | Accepted combined<br>HIV/HCV testing<br><i>n</i> = 127<br>% | Declined combined<br>HIV/HCV testing<br><i>n</i> = 70<br>% | Accepted combined<br>HIV/HCV testing<br><i>n</i> = 129<br>% | Declined combined<br>HIV/HCV testing<br><i>n</i> = 69<br>% |
| Preferences regarding type of test offered           |                                                             |                                                            |                                                             |                                                            |
| HIV only                                             | 12.6                                                        | 14.3                                                       | 11.6                                                        | 13.0                                                       |
| HCV only                                             | 1.6                                                         | 11.4                                                       | 5.4                                                         | 8.7                                                        |
| Both HIV and HCV                                     | 84.3                                                        | 74.3                                                       | 82.2                                                        | 71.0                                                       |
| Don't know                                           | 0.8                                                         | 0.0                                                        | 0.8                                                         | 7.3                                                        |
| Refuse to answer                                     | 0.8                                                         | 0.0                                                        | 0.0                                                         | 0.0                                                        |
| Main reason for preference of HIV test only          | <i>n</i> = 16                                               | <i>n</i> = 10                                              | <i>n</i> = 15                                               | <i>n</i> = 9                                               |
| Felt more at risk for HIV                            | 6.3                                                         | 30.0                                                       | 6.7                                                         | 33.3                                                       |
| Had heard a lot about HIV                            | 43.8                                                        | 30.0                                                       | 53.3                                                        | 55.6                                                       |
| More worried about HIV                               | 50.0                                                        | 10.0                                                       | 20.0                                                        | 0.0                                                        |
| Knew that he/she was not at risk for other infection | 0.0                                                         | 30.0                                                       | 13.3                                                        | 11.1                                                       |
| Don't know                                           | 0.0                                                         | 0.0                                                        | 6.7                                                         | 0.0                                                        |
| Main reason for preference of HCV test only          | <i>n</i> = 2                                                | <i>n</i> = 8                                               | <i>n</i> = 7                                                | <i>n</i> = 6                                               |
| Felt more at risk for HCV                            | 50.0                                                        | 25.0                                                       | 28.6                                                        | 16.7                                                       |
| Had heard a lot about HCV                            | 0.0                                                         | 0.0                                                        | 0.0                                                         | 0.0                                                        |
| More worried about HCV                               | 50.0                                                        | 25.0                                                       | 0.0                                                         | 33.3                                                       |
| Knew that he/she was not at risk for other infection | 0.0                                                         | 37.5                                                       | 57.2                                                        | 50.0                                                       |
| Don't know                                           | 0.0                                                         | 0.0                                                        | 0.0                                                         | 0.0                                                        |
| Used condoms                                         |                                                             |                                                            |                                                             |                                                            |

HCV = Hepatitis C Virus. HIV = Human Immunodeficiency Virus
